# Supplementary material for: Consensus-based recommendations for the management of juvenile dermatomyositis
Source: PubMed Central journal article supplement — Ann Rheum Dis. 2016 Aug 11;76(2):329–40. doi: 10.1136/annrheumdis-2016-209247 (PMC5284351; doi:10.1136/annrheumdis-2016-209247), 2016-08-11
Supplement: annrheumdis-2016-209247supp_figure.pdf [file annrheumdis-2016-209247supp_figure.pdf]

**Search strategy (Pubmed search shown):**  
Dermatomyositis[dermatomyositis[tiab] OR dermatomyositis[MeSH Terms] OR myositis[tiab] OR inflammatory myopathy[tiab] OR inflammatory myopathies[tiab])  
Children: (((((((((((((((((((((((((((((Infan\*[Title/Abstract] OR newborn\*[Title/Abstract]) OR newborn\*[Title/Abstract] OR perinat\*[Title/Abstract] OR neonat\*[Title/Abstract] OR baby[Title/Abstract] OR baby\*[Title/Abstract] OR babies[Title/Abstract] OR toddler\*[Title/Abstract] OR minors[Title/Abstract] OR minors\*[Title/Abstract] OR boy[Title/Abstract] OR boys[Title/Abstract] OR boyhood[Title/Abstract] OR girl\*[Title/Abstract] OR kid[Title/Abstract] OR kids[Title/Abstract] OR child[Title/Abstract] OR child\*[Title/Abstract] OR children\*[Title/Abstract] OR schoolchild\*[Title/Abstract] OR schoolchild[Title/Abstract] OR school child[Title/Abstract] OR school child\*[Title/Abstract] OR adolescen\*[Title/Abstract] OR juvenil\*[Title/Abstract] OR youth\*[Title/Abstract] OR teen\*[Title/Abstract] OR under\*age\*[Title/Abstract] OR pubescen\*[Title/Abstract] OR paediatric\*[Title/Abstract] OR paediatric\*[Title/Abstract] OR paediatric\*[Title/Abstract] OR school[Title/Abstract] OR school\*[Title/Abstract] OR prematur\*[Title/Abstract] OR preterm\*[Title/Abstract]))))))) OR (((Infant[MeSH Terms] OR Child[MeSH Terms] OR Adolescent[MeSH Terms] OR Paediatrics[MeSH Terms]))))  
Therapy: (Clinical[tiab] AND trials[tiab]) OR clinical trials[MeSH Terms] OR clinical trial[Publication type] OR random\*[tiab] OR "random allocation"[MeSH Terms] OR "therapeutic use"[Subheading] OR therapy[tiab] OR therapies[tiab] OR treat[tiab] OR treats[tiab] OR treatment[tiab] OR treatments[TIAB] OR treated[tiab] OR management[tiab] OR immunosuppression[tiab] OR immunosuppressive[tiab] OR immunotherapy[tiab] OR "Drug therapy"[MeSH terms] OR "immunotherapy"[MeSH terms]  
Diagnosis: diagnos\*[tiab] OR investigation[tiab] OR specific\*[tiab] OR sensitiv\*[tiab] OR specificity[tiab] OR "sensitivity and specificity"[MeSH Terms] OR diagnosis [MeSH] OR diagnosis[Subheading:noexp] OR diagnostic \*[MeSH:noexp] OR "Diagnostic Techniques and Procedures" [MeSH]

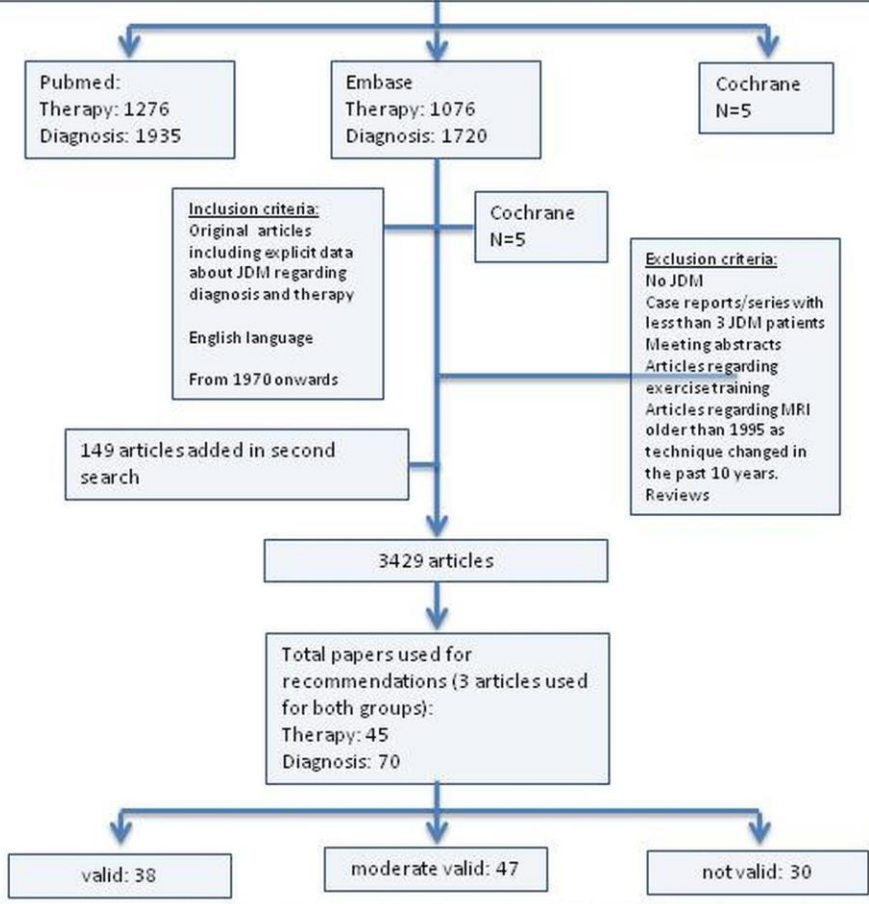

Supplementary figure 1: flow chart of search strategy for systematic literature review with detailed results of search
