# Supplementary material for: Consensus-based recommendations for the management of juvenile dermatomyositis
Source: PubMed Central journal article supplement — Ann Rheum Dis. 2016 Aug 11;76(2):329–40. doi: 10.1136/annrheumdis-2016-209247 (PMC5284351; doi:10.1136/annrheumdis-2016-209247), 2016-08-11
Supplement: annrheumdis-2016-209247supp_table.pdf [file annrheumdis-2016-209247supp_table.pdf]

Supplementary Table 1 – Refused recommendations

|                                                                                                                                             | Comments                                                                                                      | L  | S |
|---------------------------------------------------------------------------------------------------------------------------------------------|---------------------------------------------------------------------------------------------------------------|----|---|
| Ethnicity should be taken into account when using MSA to aid risk stratification of patients.                                               | Not enough evidence                                                                                           | 3  | D |
| Hydroxychloroquine may be considered as an adjunctive therapy, particularly in those with prominent skin disease.                           | Not enough evidence. Most experts believed hydroxychloroquine was not helpful from their clinical experience. | 4  | D |
| A muscle biopsy, when scored using the modified muscle biopsy tool, may correlate with clinical disease activity.                           | Not enough evidence                                                                                           | 2b | D |
| Azathioprine may be a useful adjunctive treatment to methotrexate in patients with inadequate response to methotrexate alone.               | Only studies scored not valid                                                                                 | 4  | D |
| Intensification of treatment in case of calcinosis may include addition of Infliximab / adalimumab or changing from Methotrexate to MMF.    | Not enough evidence                                                                                           | 4  | D |
| Consideration can be given to the following treatments in case of calcinosis: Biphosphonates and surgical excision in case of local lesion. | Not enough evidence                                                                                           | 4  | D |
